# Supplementary material for: Gut stem cell aging is driven by mTORC1 via a p38 MAPK-p53 pathway
Source: PubMed Central journal article supplement (PMC6940394; doi:10.1038/s41467-019-13911-x), 2020-01-02
Supplement: 41467_2019_13911_MOESM1_ESM.pdf [file 41467_2019_13911_MOESM1_ESM.pdf]

## Supplementary Information

Gut stem cell aging is driven by mTORC1 via a p38 MAPK-p53 pathway  
Dan He et al.

# Supplementary Figure 1

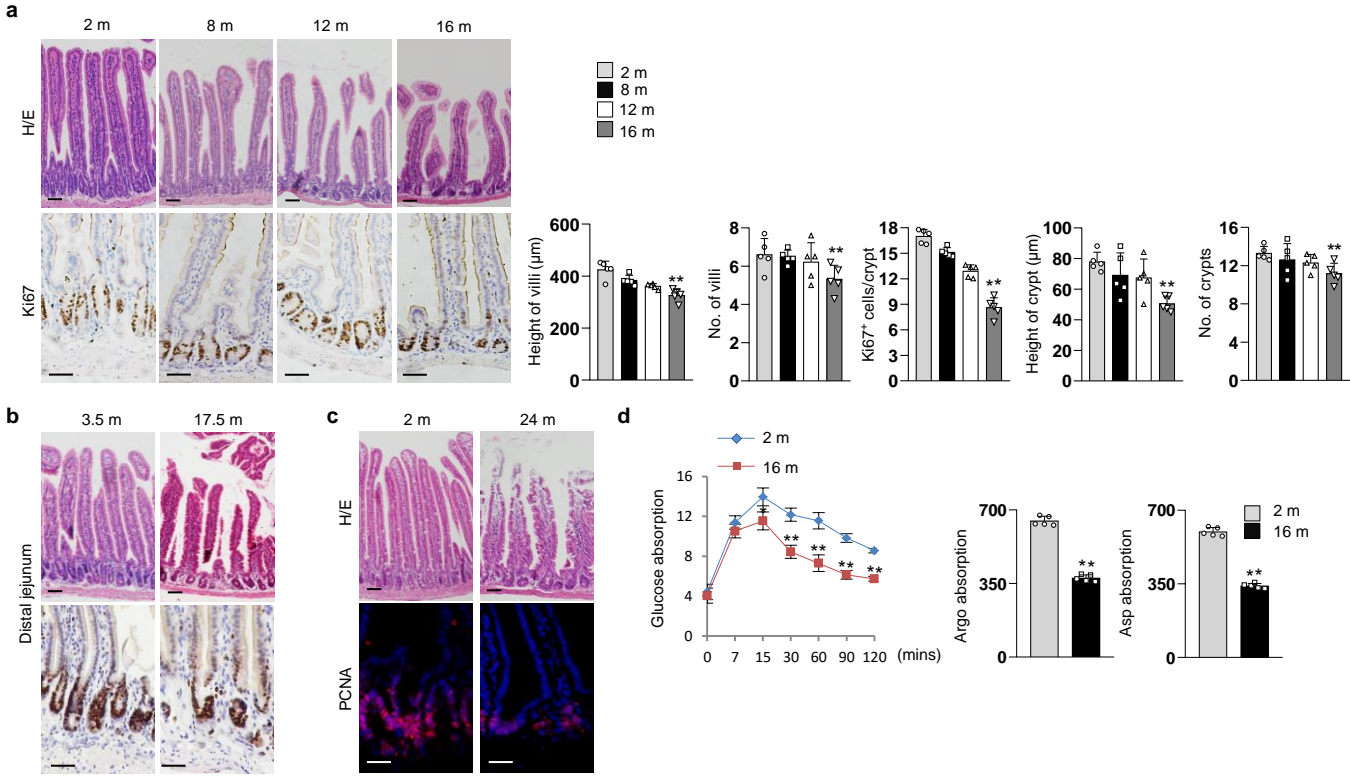

**Supplementary Figure 1. Old mice showed defects in villus/crypt structure and nutrient absorbing activities.**

(a). Comparison of villus structure and TA cell proliferation of 2-, 8-, 12-, and 16-month old mice. The proximal jejunum samples were sectioned and stained with H/E or Ki67 antibodies. Right panels: quantitation data (mean ± SEM). N=5 mice per group. \*\*p<0.01 (determined using Student's *t*-test). (b). Comparison of the distal jejunum of 3.5 and 17.5-month old mice. (c). Comparison of the proximal jejunum of 3.5 and 24-month old mice. (d). Sixteen-month-old mice showed a decrease in nutrient absorbing activities for glucose and amino acids (arginine and aspartic acid). Data are expressed as mean ± SEM. N=5 mice per group. \*p<0.05, \*\*p<0.01 (determined using Student's *t*-test).

# Supplementary Figure 2

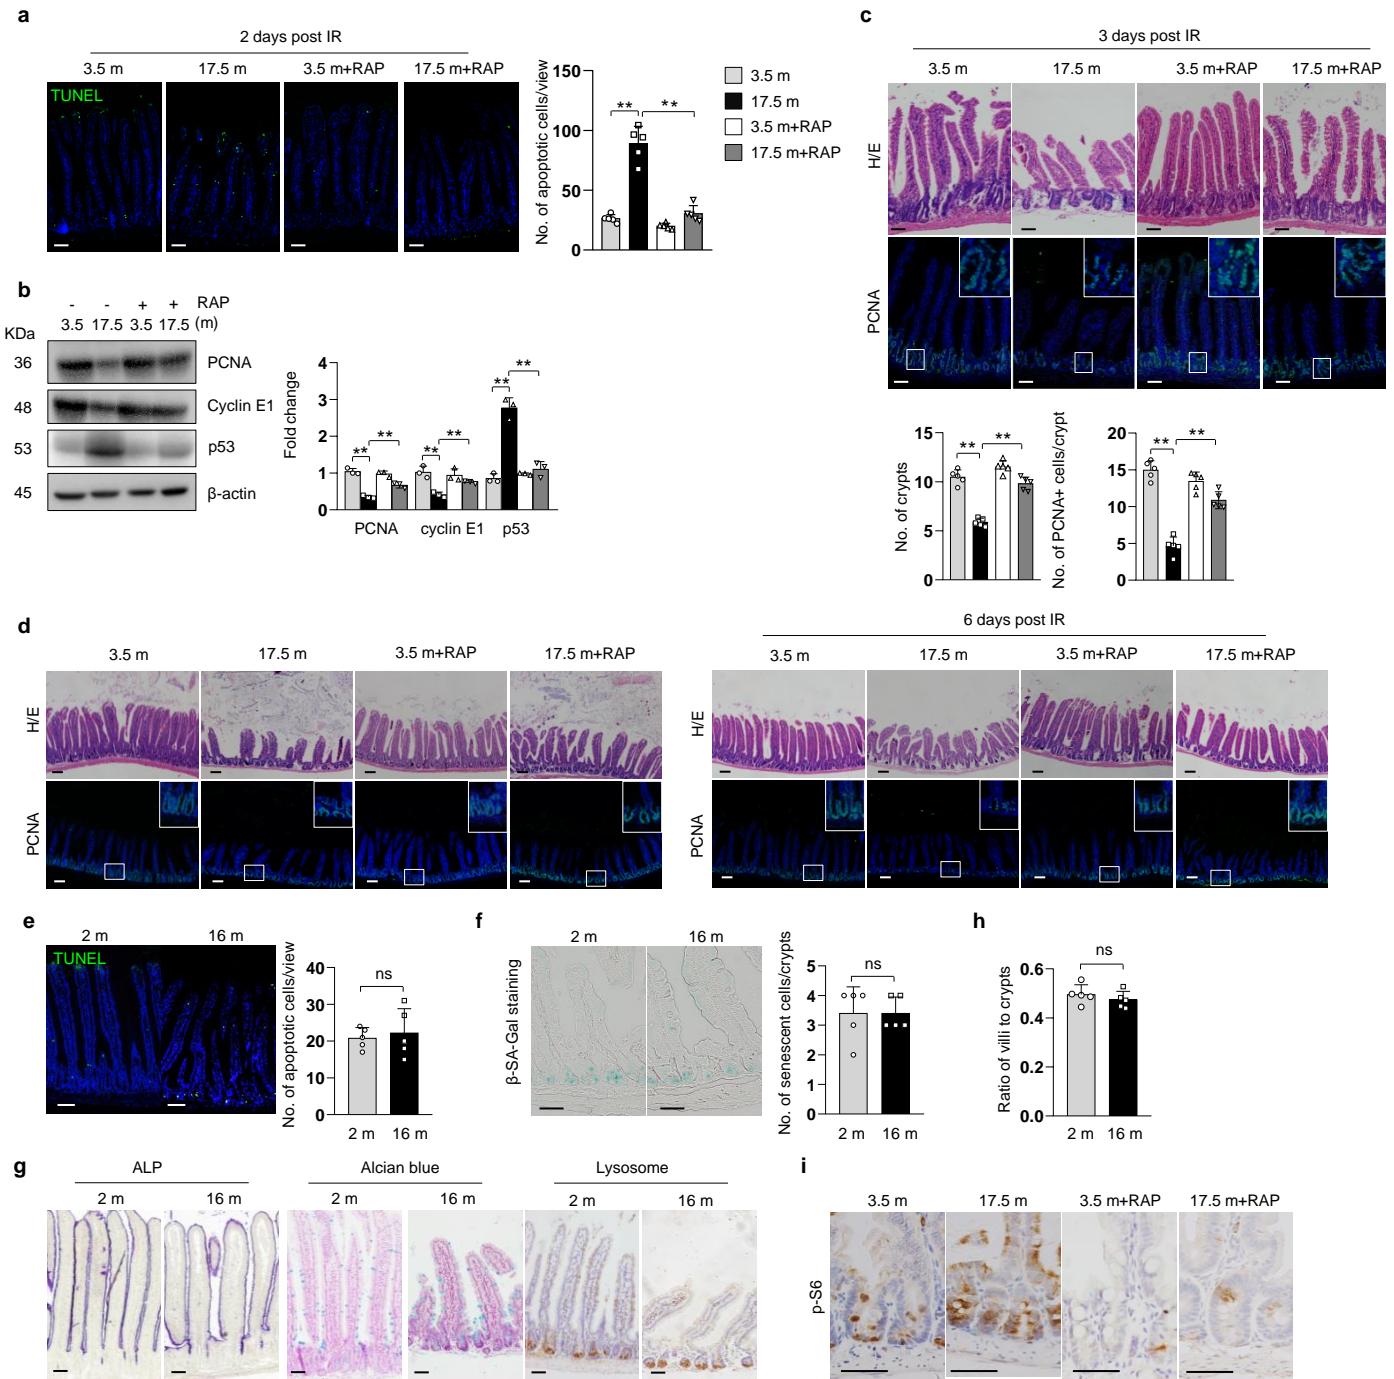

## Supplementary Figure 2. mTOR activation increases sensitivity to IR in villi/crypts of geriatric mice.

(a). Seventeen and half-month-old mice showed an increase in apoptotic cells 2 days after IR, which was rescued by RAP. Right panels: quantification data (mean  $\pm$  SEM). N=5 mice per group. \*\* $p < 0.01$  (determined using Student's *t*-test). (b). The intestine samples of 17.5-month-old mice showed decreases in PCNA and cyclin E and an increase in p53 in crypt samples at day 2 after IR, which was rescued by RAP. Right panel: quantification data (mean  $\pm$  SEM). N=5 mice per group. \*\*  $p < 0.01$  (determined using Student's *t*-test). (c). Seventeen and half-month-old mice showed increased sensitivity to IR-induced decreases in the numbers of crypts and proliferating cells compared to young mice at day 3 post IR, which were partially rescued by 1.5 months of RAP treatment (3 mg/kg body weight) starting at 16 months of age. Bottom panels: quantitation data (mean  $\pm$  SEM). N=5 mice per group. \*\* $p < 0.01$  (determined using Student's *t*-test). (d). Lower magnification images of intestinal sections of 3.5 and 17.5-month-old mice (left panel) and villus regeneration in these mice at day 6 post IR (right panel). (e-h). No difference was observed between 2- and 16-month-old mice in the percentage of apoptotic cells (e) or SA- $\beta$ -Gal senescent cells (f) in the villi, differentiation of villus cells (g), or the villus-to-crypt ratios (h). N=5. ns, not significant. (i). mTORC1 activation was inhibited by RAP treatment. The 16-month-old mice were sacrificed after 1.5 months of RAP treatment and the proximal jejunum sections were stained for p-S6.

# Supplementary Figure 3

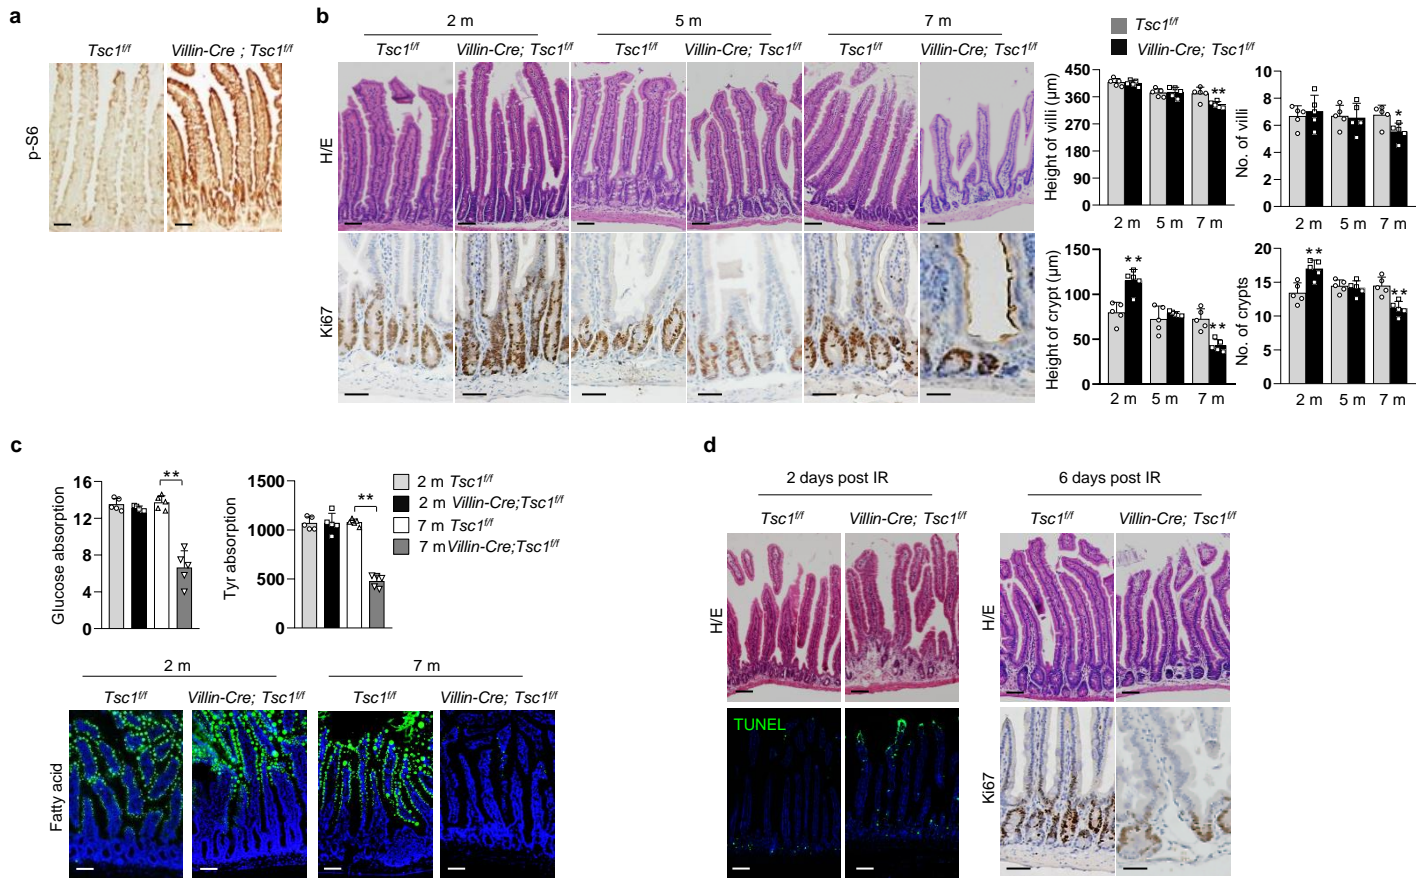

## Supplementary Figure 3. Ablation of *Tsc1* in enterocytes induces villus premature aging.

(a). Immunostaining of p-S6 showed that *Villin-Cre; Tsc1<sup>fl/fl</sup>* mouse intestine sections displayed enhanced mTORC1 activation. (b). Two-month-old *Villin-Cre; Tsc1<sup>fl/fl</sup>* mice showed a villus/crypt overgrowth phenotype, 5-month-old mutant mice showed villi similar to age-matched wild type mice, and 7-month-old mutant mice showed aging-like change in villus structure. Right panels: quantitation data (mean  $\pm$  SEM). N=5 mice per group. \* $p < 0.05$ , \*\* $p < 0.01$  (determined using Student's *t*-test). (c). *Villin-Cre; Tsc1<sup>fl/fl</sup>* mice showed defects in nutrient absorption activities at 7 months of age. Data are expressed as mean  $\pm$  SEM. N=5 mice per group. \*\* $p < 0.01$  (determined using Student's *t*-test). (d). *Villin-Cre; Tsc1<sup>fl/fl</sup>* mice showed increased sensitivity to IR and villus regeneration defects. The 2-month-old mice were radiated at 5.0 Gy and were sacrificed 2 or 6 days later. Intestinal sections were stained with H/E, TUNEL, or anti-Ki67 antibodies.

# Supplementary Figure 4

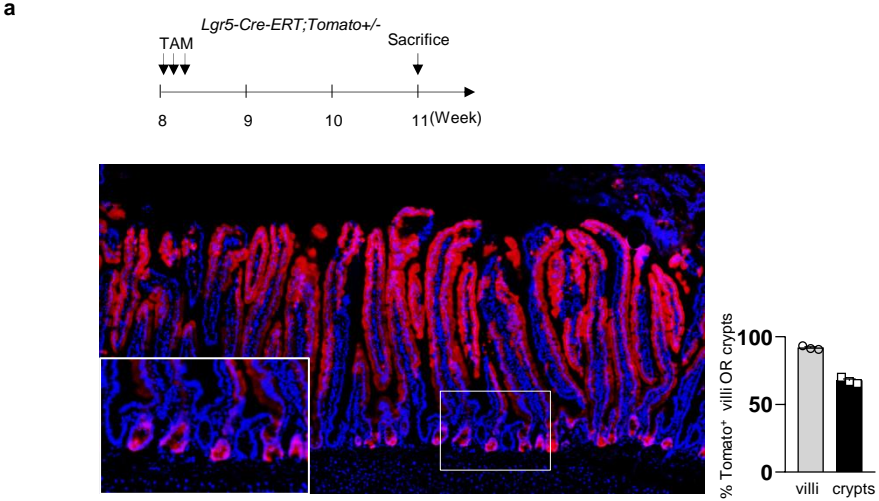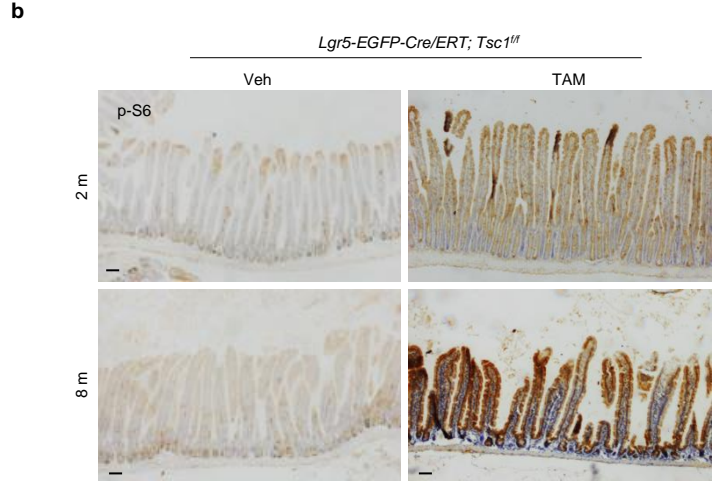

**Supplementary Figure 4. Labelling of villi in *Lgr5-CreERT; tdTomato* mice and mTORC1 activation in *Lgr5-CreERT; Tsc1<sup>fl/fl</sup>* mice.**

(a). Tracing with *Lgr5-CreERT; tdTomato* mice revealed that almost all villi are labeled. One-month-old mice were administrated 3 daily doses of TAM and the mice were euthanized at 2 months of age. Right panel: quantitation data. N=3.

(b). Immunostaining of p-S6 revealed that *Lgr5-CreERT; Tsc1<sup>fl/fl</sup>* mouse intestine sections showed enhanced mTORC1 activation 1 or 7 months after TAM treatment in almost all villi.

# Supplementary Figure 5

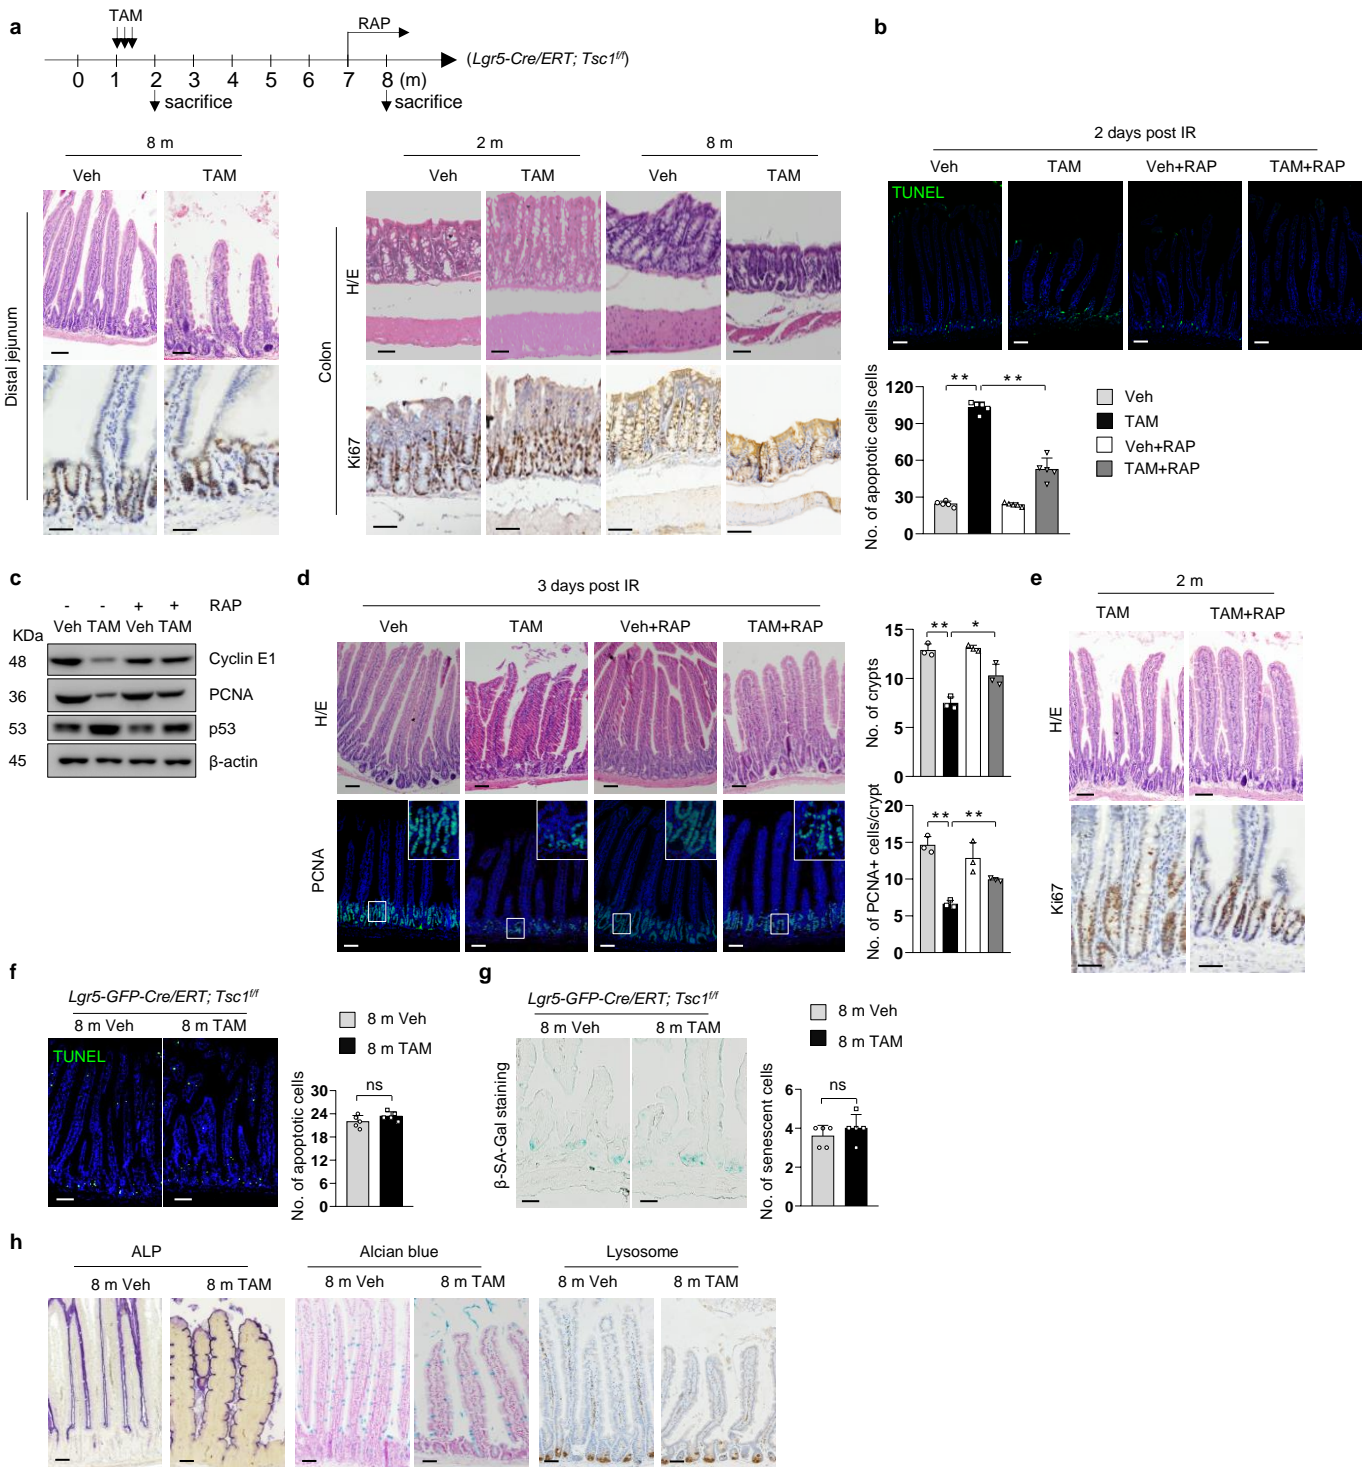

## Supplementary Figure 5. Ablation of *Tsc1* in ISCs induces villus premature aging.

(a). H/E staining revealed that *Lgr5-Cre/ERT; Tsc1<sup>fl/fl</sup>* mice showed aging of distal jejunum at 8 months of age and overgrowth of colon crypts at 2 months of age and atrophy at 8 months of age. (b). *Lgr5-Cre/ERT; Tsc1<sup>fl/fl</sup>* mice showed an increase in apoptotic cells on intestinal sections 2 days after IR, which was rescued by RAP. Bottom panels: quantification data (mean  $\pm$  SEM). N=5 mice per group.  $**p < 0.01$  (determined using Student's *t*-test). (c). The intestine samples of *Lgr5-Cre/ERT; Tsc1<sup>fl/fl</sup>* mice showed decreases in PCNA and cyclin E and an increase in p53 in crypt samples at day 2 after IR, which was rescued by RAP. (d). *Lgr5-Cre/ERT; Tsc1<sup>fl/fl</sup>* mice showed increased sensitivity to IR-induced decreases in the numbers of crypts and proliferating cells at day 3 post IR. Right panels: quantification data (mean  $\pm$  SEM). N=3 mice per group.  $*p < 0.05$ ,  $**p < 0.01$  (determined using Student's *t*-test). (e). RAP treatment for 1 month rescued the overgrowth of crypts in young *Lgr5-Cre/ERT; Tsc1<sup>fl/fl</sup>* mice. (f-h). The villi of 8-month-old *Lgr5-Cre/ERT; Tsc1<sup>fl/fl</sup>* mice (TAM injected) showed no change in the number of apoptotic cells (f),  $\beta$ -SA-Gal positive senescent cells (g), or differentiation of villus cells (h). N=5. ns, not significant.

Supplementary Figure 6

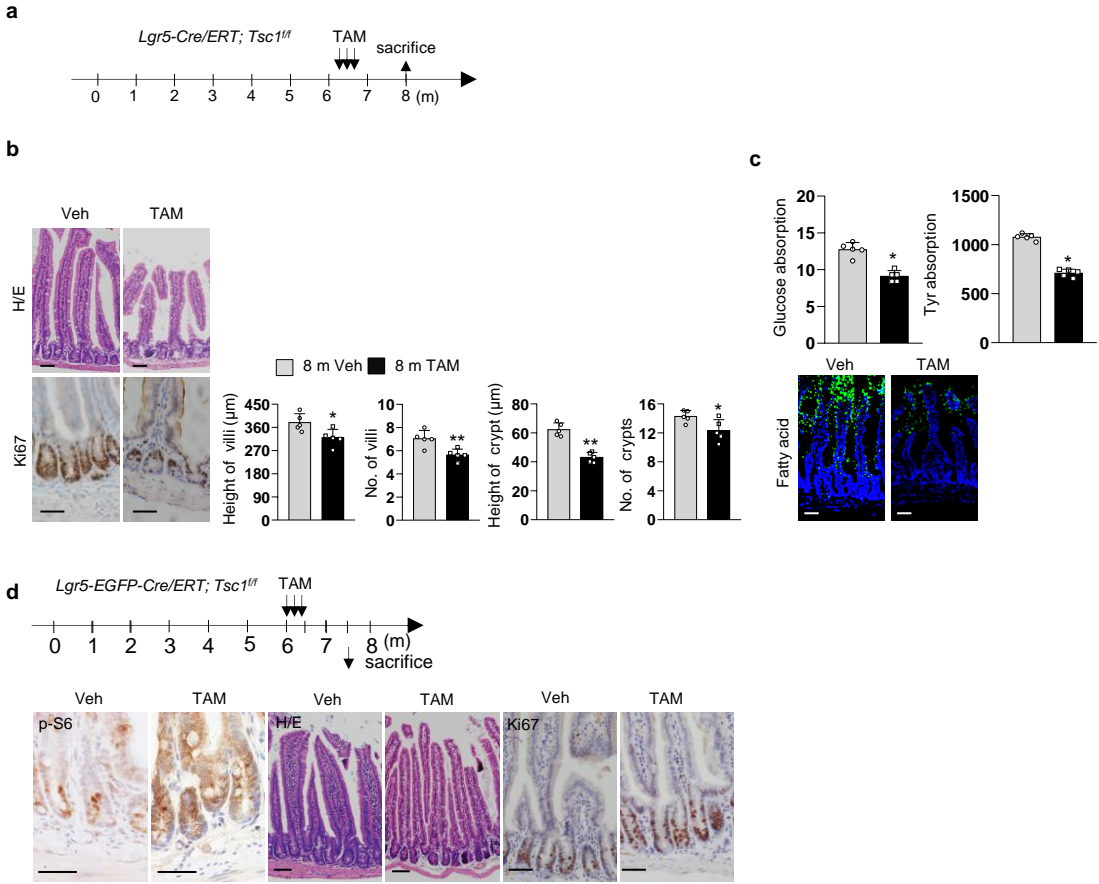

**Supplementary Figure 6. Ablation of *Tsc1* in 6.5-month-old mice induces villus premature aging.**

(a). Diagram showing the time for TAM administration (for b and c). (b,c). Ablation of *Tsc1* in 6.5-month-old mice induced defects in villus and crypt structure (b) and decreased nutrient absorption activities at 8 months of age (c). Right panels for (b): quantification data (mean ± SEM). N=5 mice per group. \*p<0.05, \*\*p<0.01 (determined using Student's *t*-test). (d). H/E staining revealed that administration of TAM to 6.5-month-old *Lgr5-Cre/ERT; Tsc1<sup>fl</sup>* mice did not result in overgrowth of the crypt at 7.5 months of age.

# Supplementary Figure 7

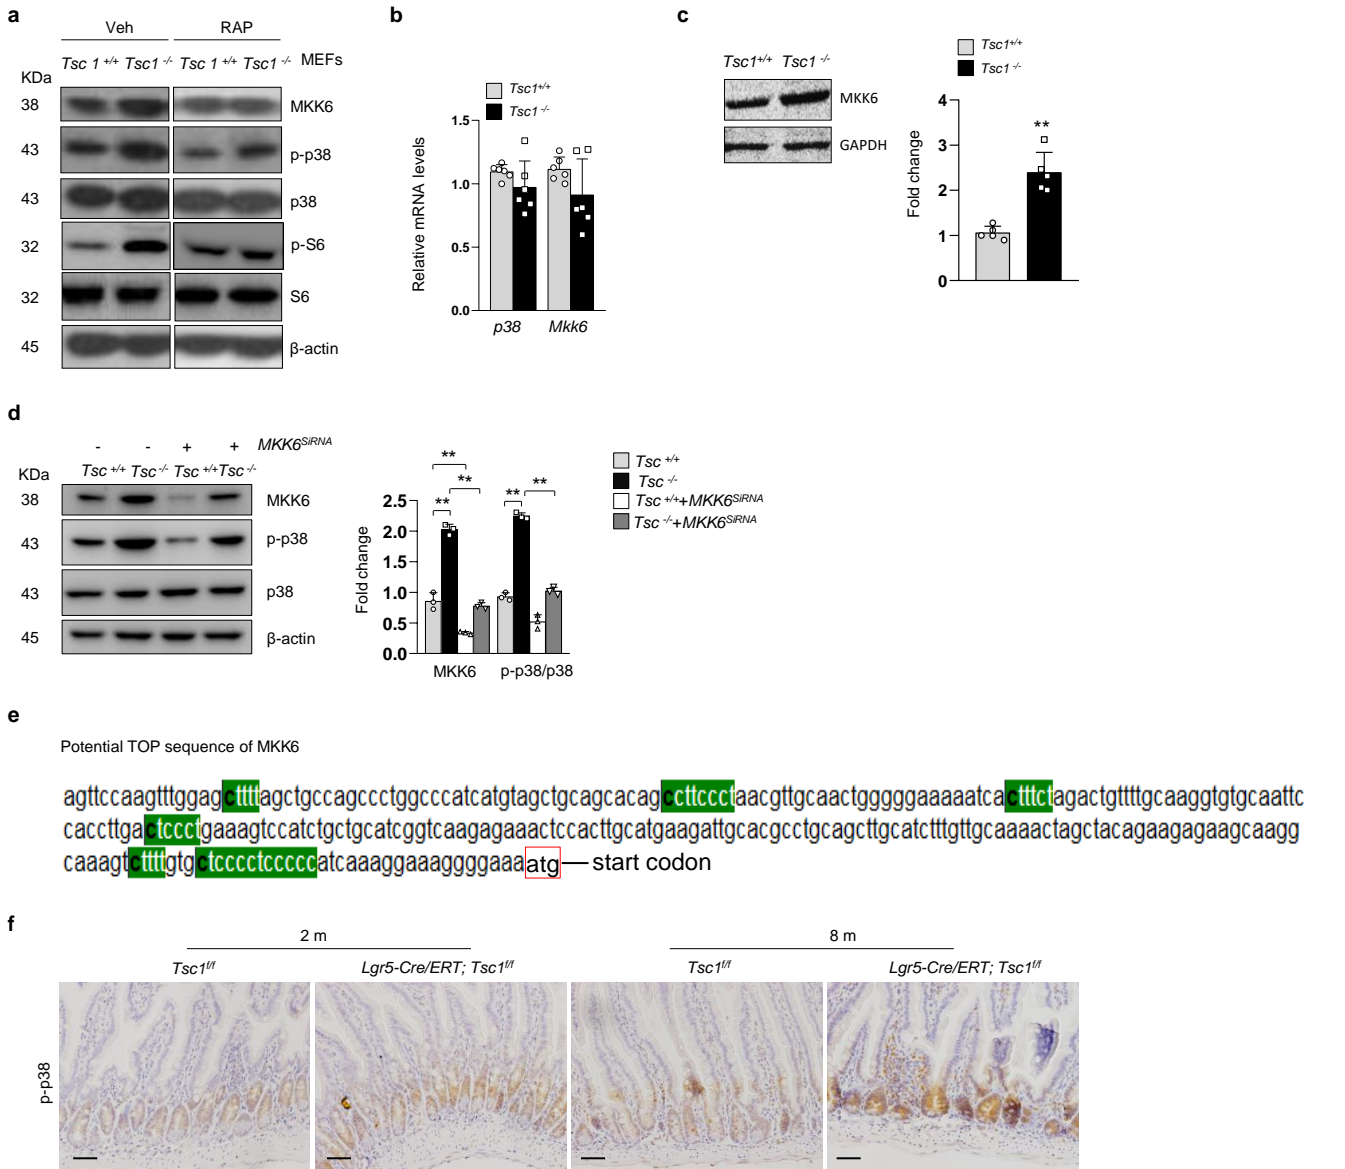

## Supplementary Figure 7. *Tsc1* deficiency leads to increased expression of MKK6 and activation of p38 MAPKs.

(a). Western blot results revealed that *Tsc1*<sup>-/-</sup> MEFs showed an increase in expression of MKK6 and activation of p38 MAPKs, which were suppressed by RAP. Primary MEFs were derived from *Tsc1*<sup>fl/fl</sup> mice, infected with Cre-expressing retroviruses, selected for 3 days with puromycin, and then used for western blot analysis. (b). Quantitative PCR results showed that *Tsc1* deficiency did not significantly alter the mRNA levels of *Mkk6* in MEFs. The mRNA level of wild type cells was set at 1.0. N=6. (c). *Tsc1* deficiency increased the levels of radio-labelled MKK6 protein in MEFs. Right panel: quantitation data (mean ± SD). N=5 repetitive experiments. \*\*p<0.01 (determined using Student's *t*-test). (d). Western blot results showed that knockdown of MKK6 led to a decrease in p38MAPK activation in *Tsc1* deficient MEFs. Right panel: quantitation data (mean ± SD). N=3 repetitive experiments. \*\*p<0.01, determined using Student's *t*-test. (e). Sequences of the mouse *Mkk6* 5' untranslated region. The putative TOP sequences were highlighted. (f). Immunostaining revealed that activation of p38 MAPKs was further enhanced in crypt cells of 8-month-old *Lgr5-Cre/ERT; Tsc1*<sup>fl/fl</sup> mice (TAM injected). The proximal jejunum sections were stained for p-p38 MAPKs.



## Supplementary Figure 8

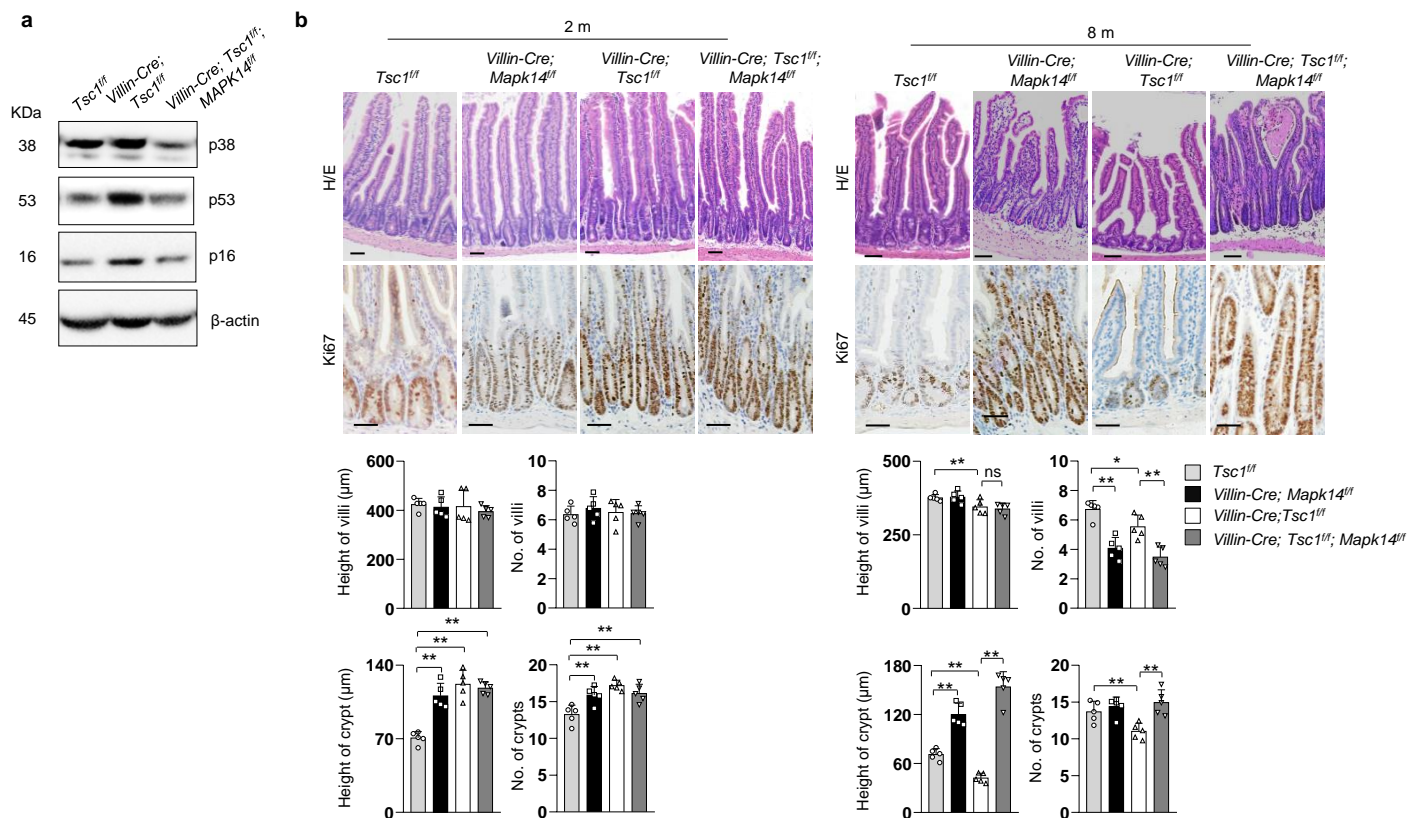

### Supplementary Figure 8. p38 MAPKs mediate the pro-aging effects of mTORC1 in Villin-Cre; Tsc1<sup>fl/fl</sup> mice.

(a). Western blot analysis revealed that p38 $\alpha$  was largely deleted in small intestine samples of Villin-Cre; Mapk14<sup>fl/fl</sup> mice. (b). Mapk14 deficiency rescued villus premature aging and led to overgrowth of villus/crypt in Villin-Cre; Tsc1<sup>fl/fl</sup> mice at 8 months of age. The decrease in the number of villi was due to fusion of the villi. Bottom panels: quantitation data (mean  $\pm$  SEM). N=5 mice per group. \*\*p<0.01 (determined using Student's *t*-test).

# Supplementary Figure 9

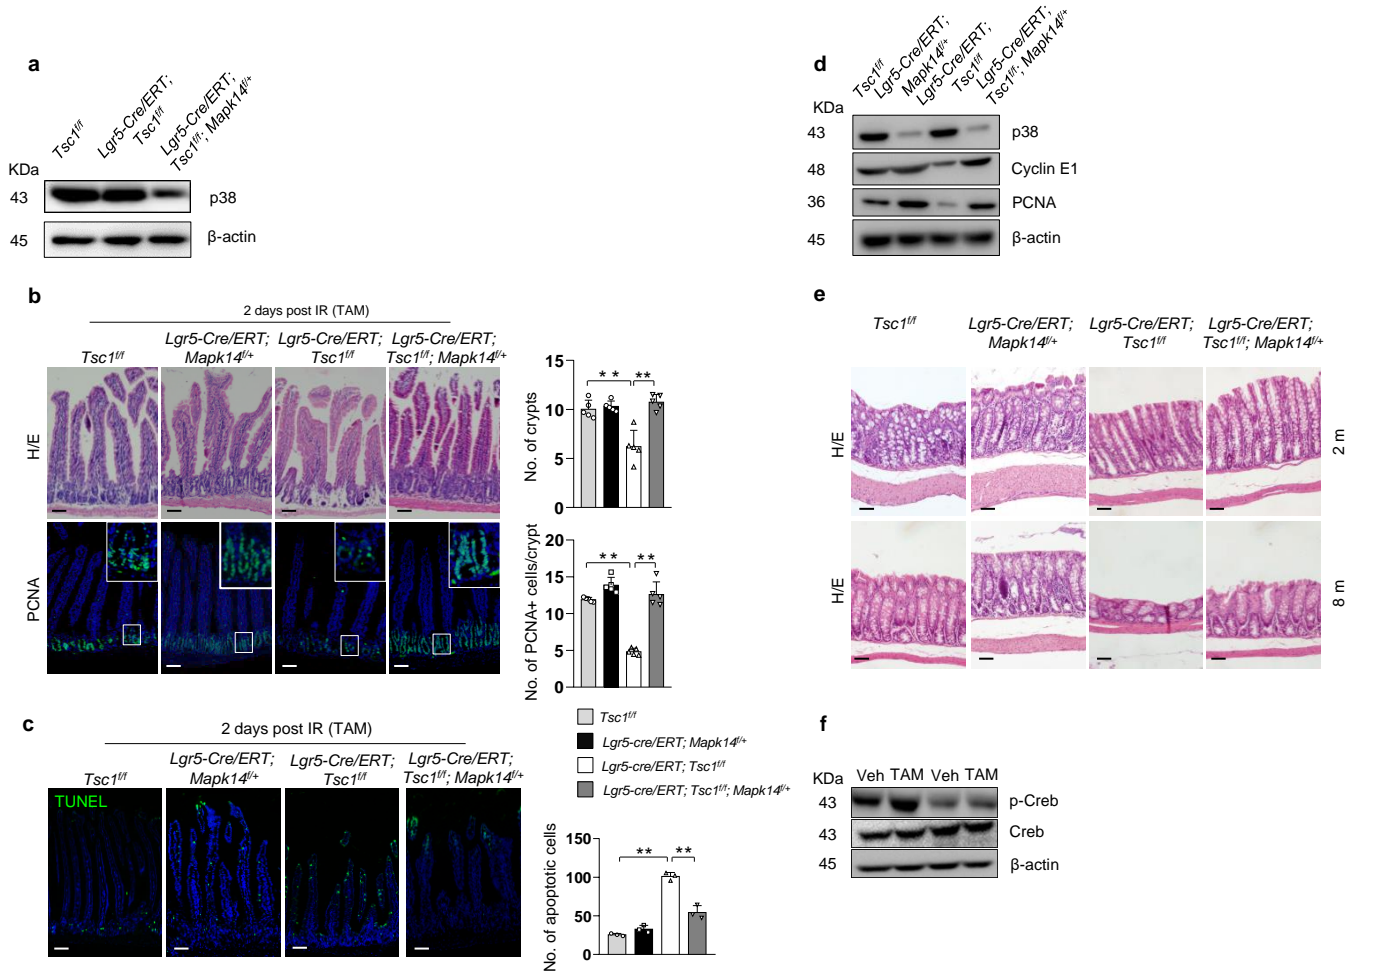

## Supplementary Figure 9. p38 MAPKs mediate the pro-aging effects of mTORC1 in *Lgr5-Cre/ERT; Tsc1<sup>fl/fl</sup>* mice.

(a). Western blot analysis revealed that p38 $\alpha$  was deleted in crypt samples of *Lgr5-Cre/ERT; Mapk14<sup>fl/fl</sup>* mice. (b). *Mapk14* haplo-deficiency rescued the increased sensitivity to IR-induced decreases in the numbers of crypts and proliferating cells at day 2 post IR. Right panels: quantitation data (mean  $\pm$  SEM). N=5 mice per group. \*\*p<0.01 (determined using Student's *t*-test). (c). *Mapk14* haplo-deficiency rescued the increase in apoptotic cells 2 days after IR in *Lgr5-Cre/ERT; Tsc1<sup>fl/fl</sup>* mice. Bottom panels: quantitation data (mean  $\pm$  SEM). N=3 mice per group. \*\*p<0.01(determined using Student's *t*-test). (d). *Mapk14* haplo-deficiency rescued the decreases in PCNA and cyclin E and increase in p53 in crypt samples of *Lgr5-Cre/ERT; Tsc1<sup>fl/fl</sup>* mice. (e). *Mapk14* haplo-deficiency partially rescued colon crypt atrophy of *Lgr5-Cre/ERT; Tsc1<sup>fl/fl</sup>* mice at 8 months of age. (f). SB203580 (SB) inhibited p38 MAPK activation, with p-CreB as an indicator. The mice were treated with SB203580 daily.

# Supplementary Figure 10

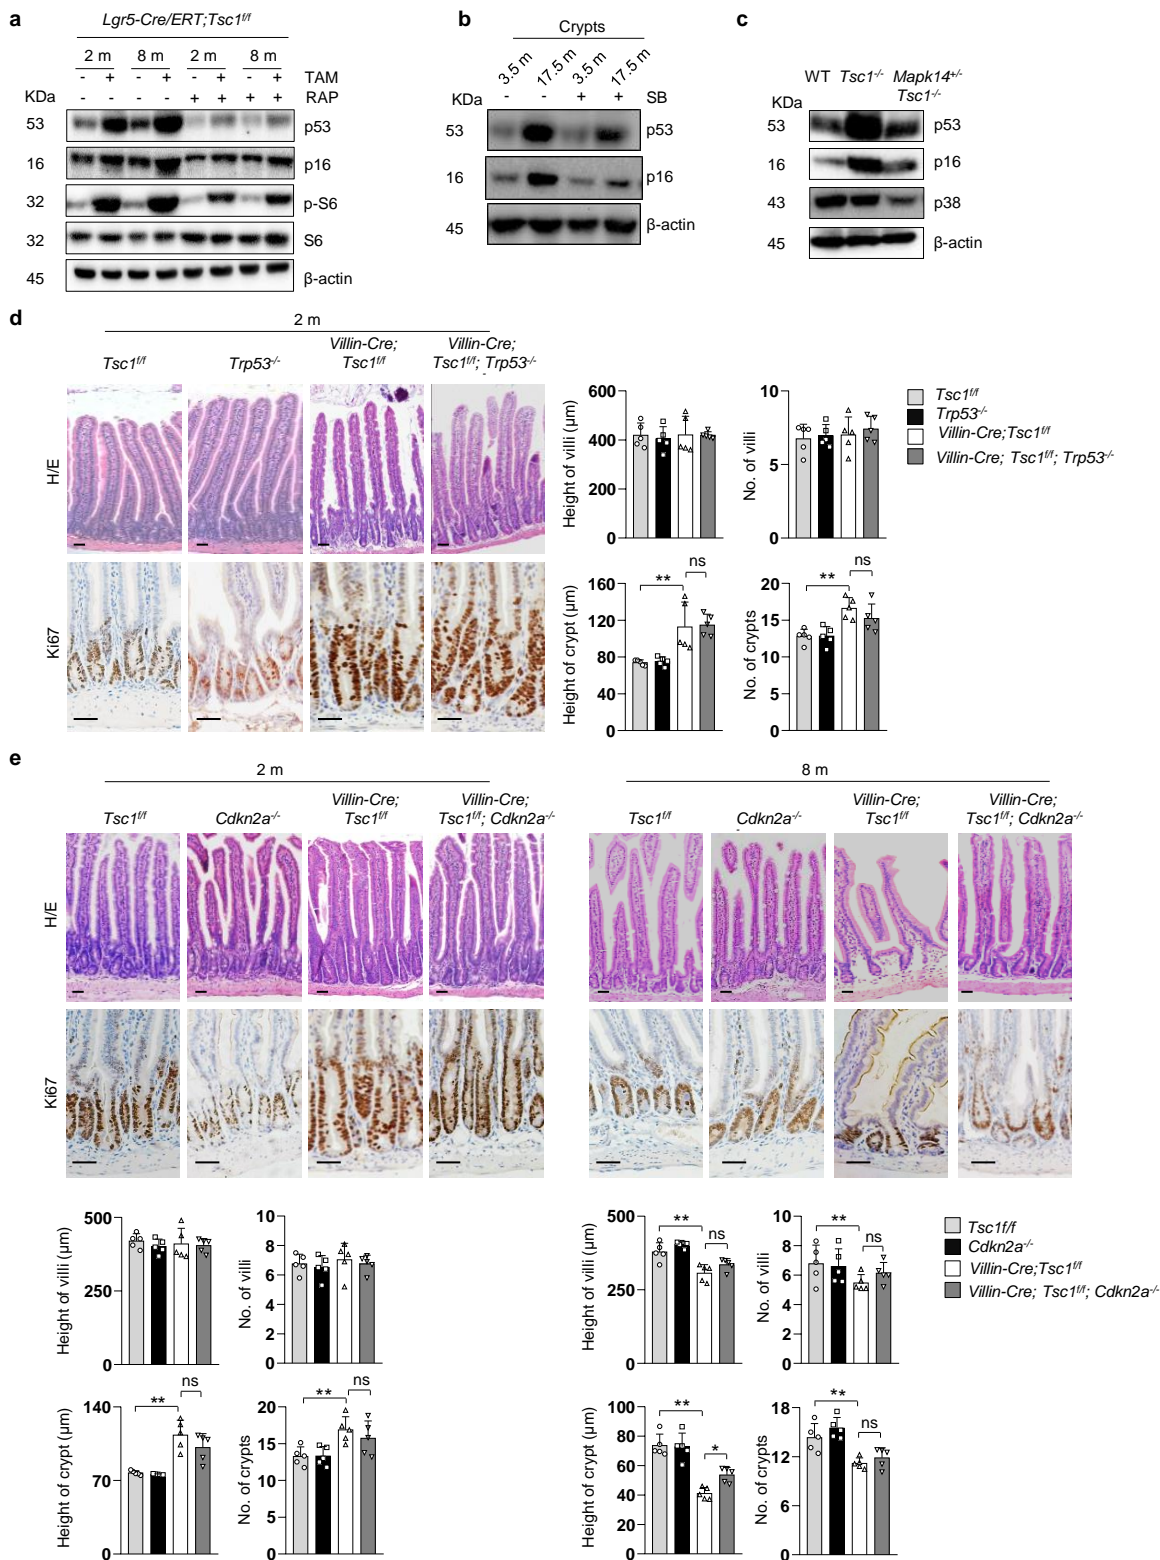

## Supplementary Figure 10. The different effects of p53 and p16 on mTORC1-driven villus aging.

(a). Western blot results showed that *Tsc1* deletion induced an increase in the protein levels of p53 and p16 in crypt samples, which were suppressed by RAP. (b). Western blot results revealed that 17.5-month-old mice showed an increase in the levels of p53 and p16 in the crypts, which were suppressed by treating the mice with SB203580. (c). *Mapk14* haplo-deficiency suppressed the elevation of p53 and p16 in crypt samples of *Lgr5-CreERT; Tsc1<sup>fl/fl</sup>* mice. (d). H/E staining of intestine sections of 2-month-old *Villin-Cre; Tsc1<sup>fl/fl</sup>*, *Trp53<sup>-/-</sup>*, and *Villin-Cre; Tsc1<sup>fl/fl</sup>; Trp53<sup>-/-</sup>* mice. Right panels: quantitation data (mean ± SEM). N=5. \*\*p<0.01 (determined using Student's *t*-test). (e). H/E staining of intestine sections of 2- and 8-month-old *Villin-Cre; Tsc1<sup>fl/fl</sup>*, *Cdkn2a<sup>-/-</sup>* mice, and *Villin-Cre; Tsc1<sup>fl/fl</sup>; Cdkn2a<sup>-/-</sup>* mice. Bottom panels: quantitation data (mean ± SEM). N=4 mice per group. \*p<0.05, \*\*p<0.01 (determined using Student's *t*-test).

Supplementary Figure 11. Uncropped western blot images.

Fig. 1g

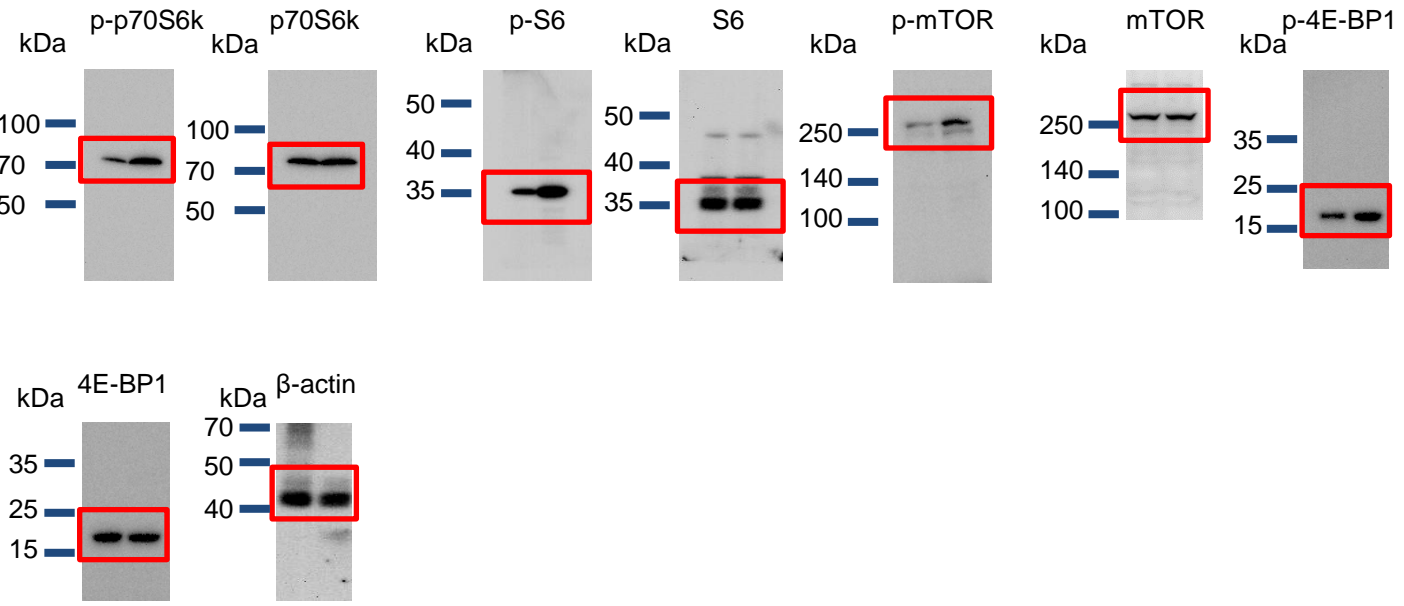

**Fig. 4a**

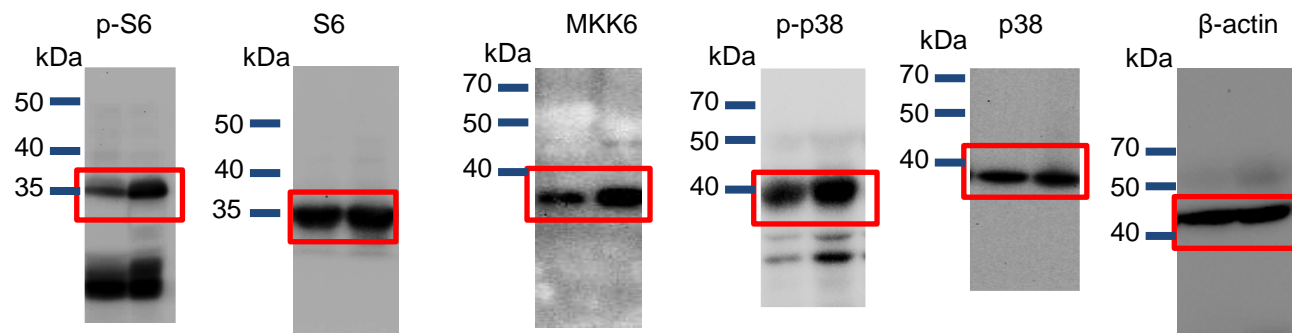

**Fig. 4b**

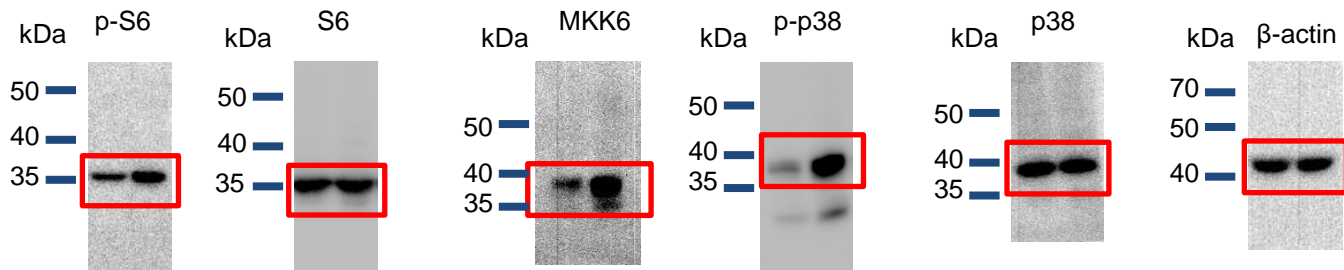

**Fig. 4d**

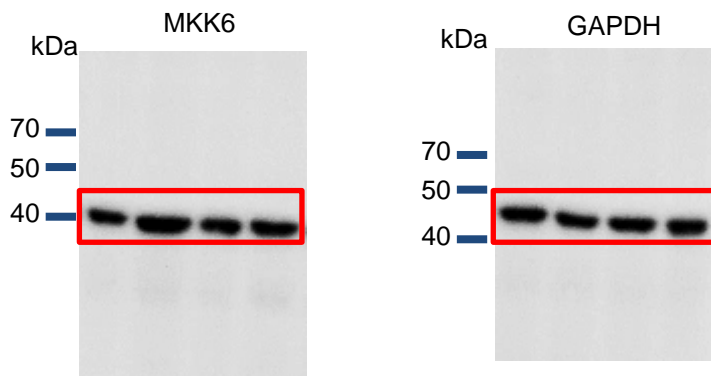

**Fig. 4e**

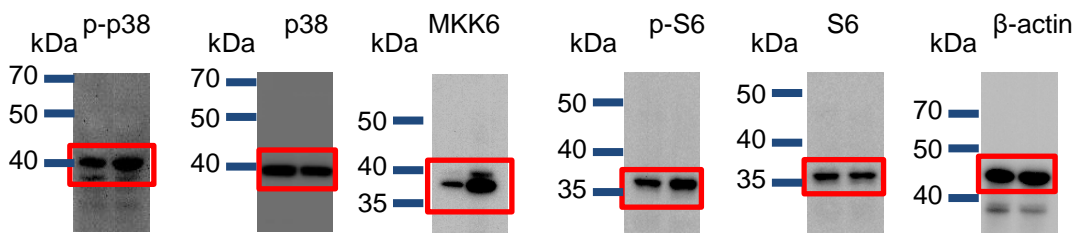

**Fig. 6a**

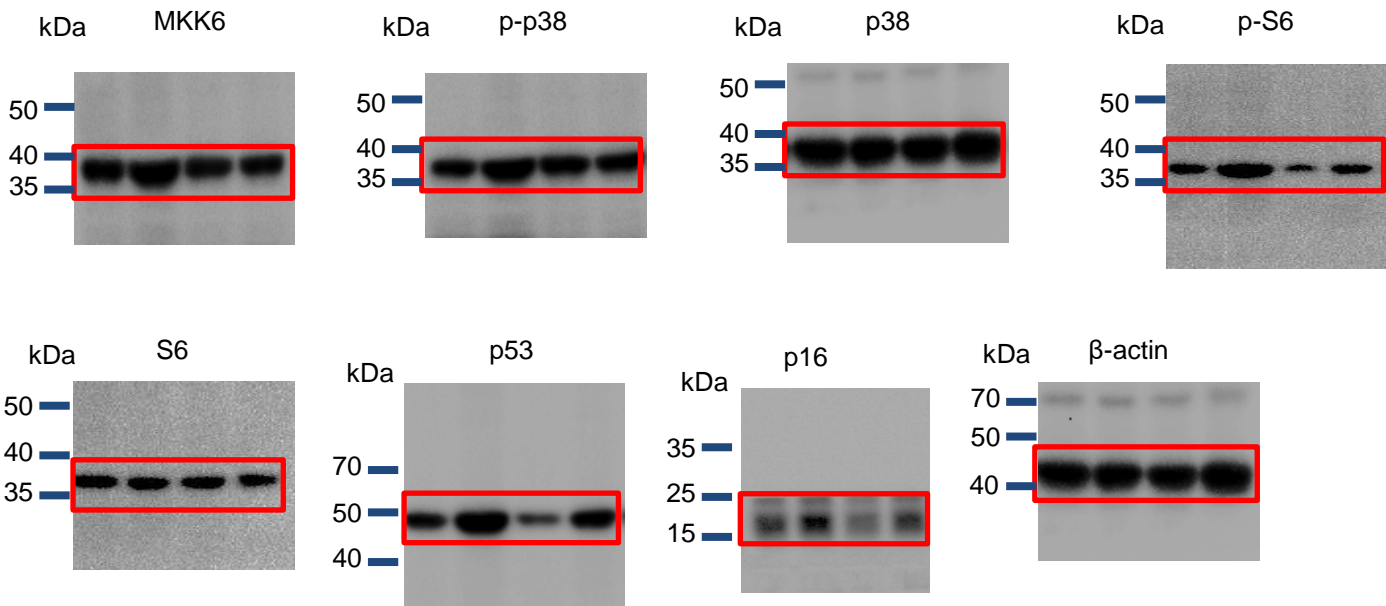

**Supplementary Fig. 2b**

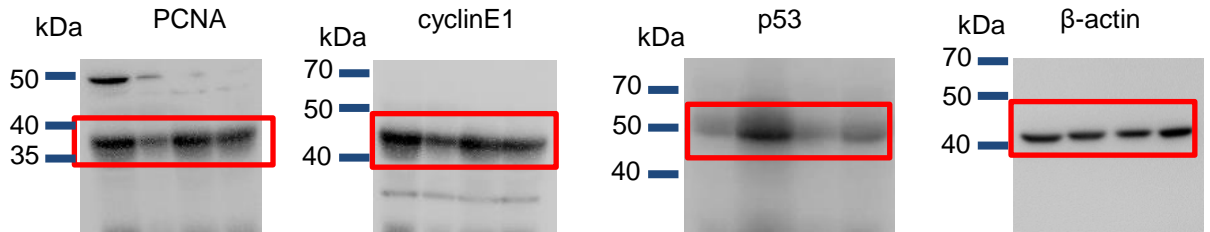

**Supplementary Fig. 5c**

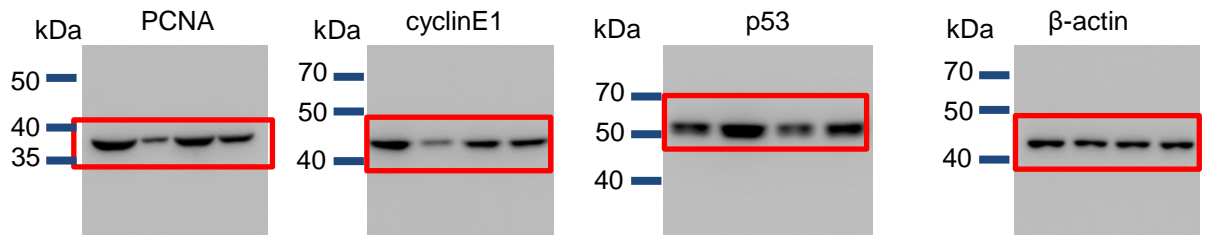

**Supplementary Fig. 7a**

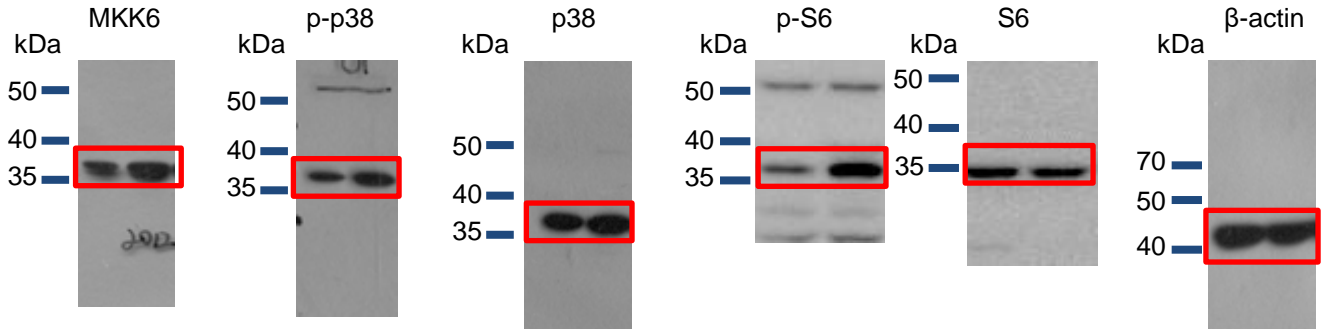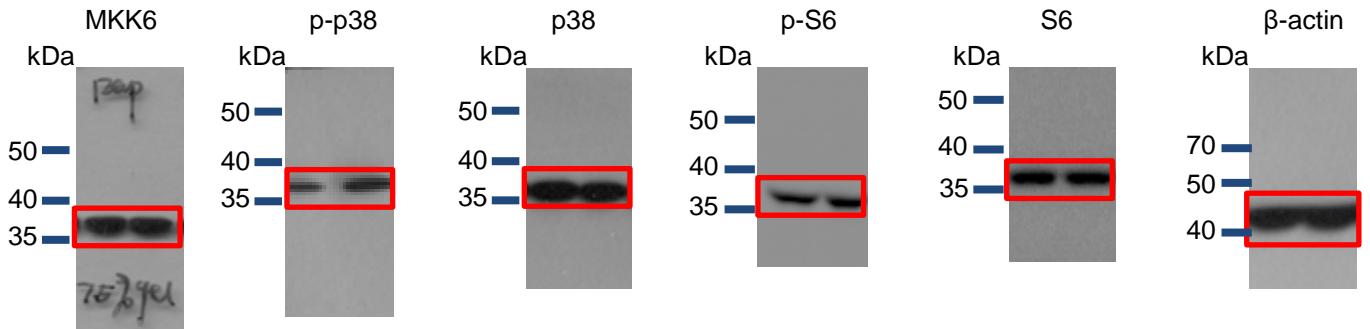

**Supplementary Fig. 7c**

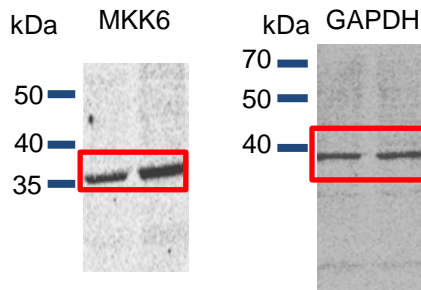

**Supplementary Fig. 7d**

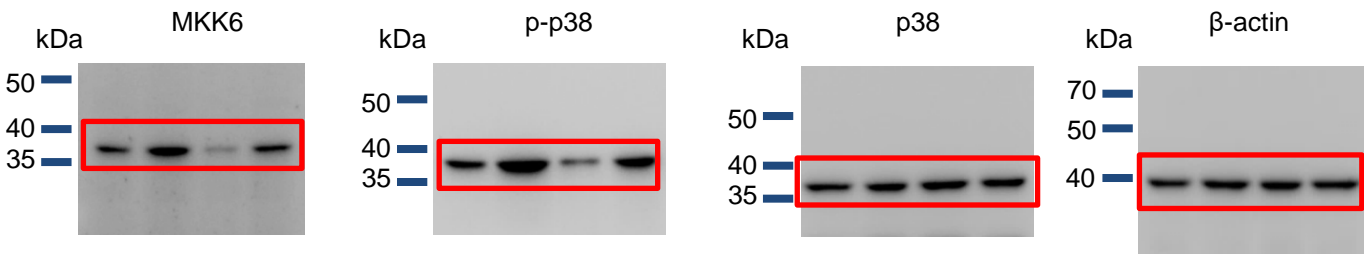



Supplementary Fig. 8a

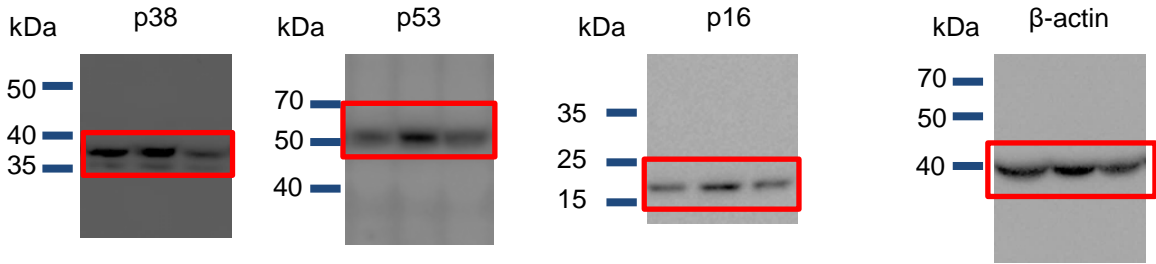

**Supplementary Fig. 9a**

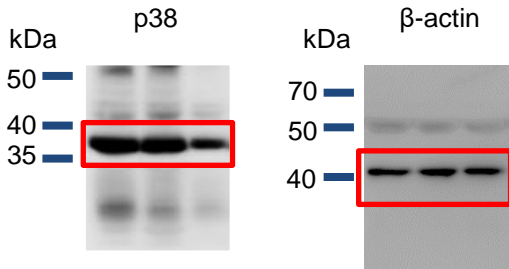

**Supplementary Fig. 9d**

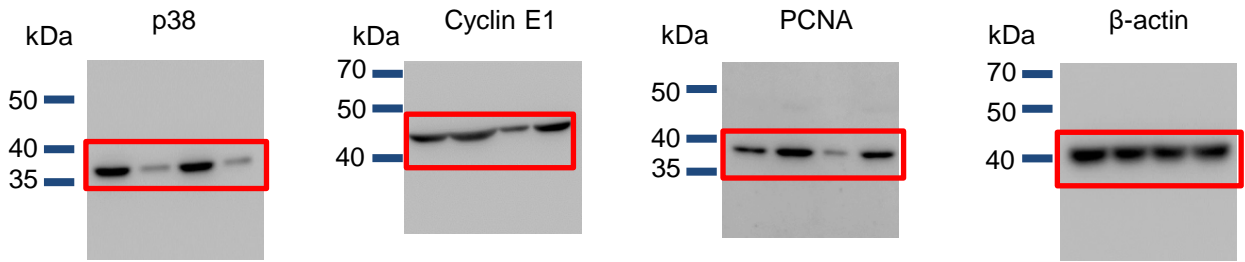

**Fig. s9f.**

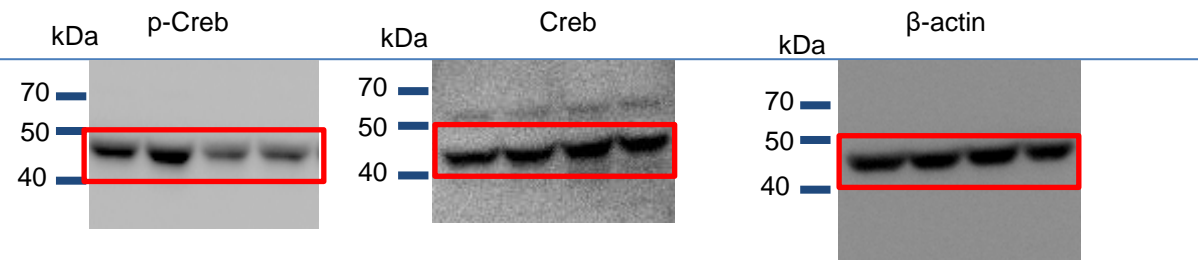

Supplementary Fig. 10a

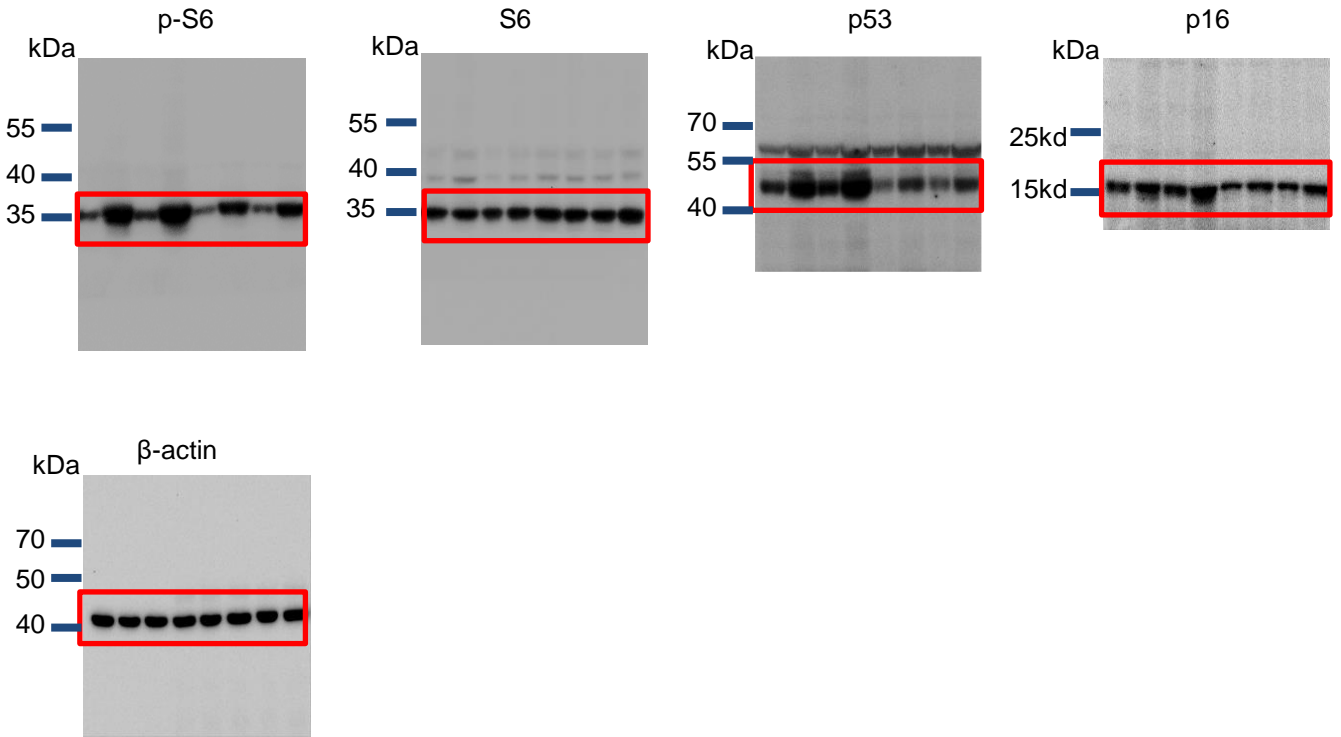

Supplementary Fig. 10b

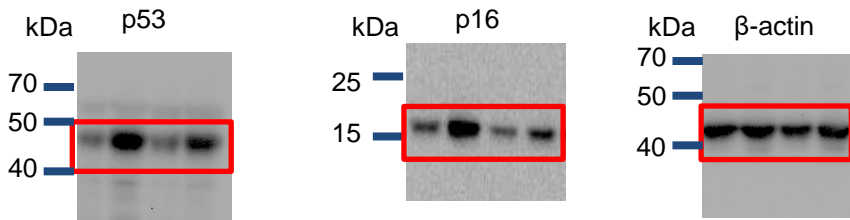

Fig. s10c.

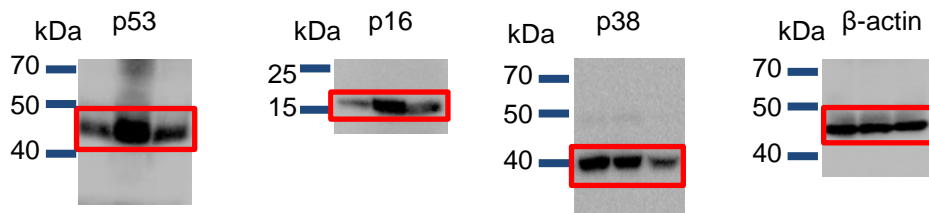

## Supplementary Table 1

| Protein List               | Signals (WT) | Signals (KO) | KO/WT |  |
|----------------------------|--------------|--------------|-------|--|
| ATRIP (Ab-68/72)           | 676.50       | 2344.33      | 3.47  |  |
| Bax (N-term)               | 351.00       | 553.83       | 1.58  |  |
| BCL-2 (Phospho-Ser87)      | 133.33       | 212.33       | 1.59  |  |
| Beta actin                 | 168.50       | 280.00       | 1.66  |  |
| BRCAl (Ab-1423)            | 3750.50      | 10391.67     | 2.77  |  |
| Caspase-3 (Phospho-Ser150) | 137.60       | 213.67       | 1.55  |  |
| CDK2 (Ab-160)              | 136.00       | 245.67       | 1.81  |  |
| Chk1 (Ab-286)              | 180.83       | 420.33       | 2.32  |  |
| Chk1 (Ab-317)              | 128.83       | 296.17       | 2.30  |  |
| Chk2 (Ab-383)              | 266.67       | 406.33       | 1.52  |  |
| Chk2 (Ab-68)               | 369.33       | 2164.50      | 5.86  |  |
| Chk2 (Phospho-Ser516)      | 144.83       | 228.83       | 1.58  |  |
| Cyclin D1 (ab-286)         | 837.00       | 1610.60      | 1.92  |  |
| Cyclin D1 (Ab-90)          | 219.33       | 374.83       | 1.71  |  |
| Cyclin D1 (Phospho-Thr286) | 237.17       | 735.00       | 3.10  |  |
| Cyclin E1 (Ab-77)          | 1691.40      | 3589.40      | 2.12  |  |
| DNA-PK (Ab-2638)           | 178.83       | 370.83       | 2.07  |  |
| E2F1 (Ab-433)              | 323.50       | 1301.17      | 4.02  |  |
| ERK3 (Phospho-Ser189)      | 125.20       | 191.17       | 1.53  |  |
| HDAC1 (Ab-421)             | 5833.50      | 11575.67     | 1.98  |  |
| HDAC1 (Phospho-Ser421)     | 187.40       | 309.33       | 1.65  |  |
| HDAC2 (Phospho-Ser394)     | 196.50       | 363.33       | 1.85  |  |
| HDAC3 (Ab-424)             | 261.33       | 703.33       | 2.69  |  |
| HDAC4 (Phospho-Ser632)     | 158.00       | 263.67       | 1.67  |  |
| HDAC5 (Phospho-Ser259)     | 154.50       | 260.00       | 1.68  |  |
| HDAC5 (Phospho-Ser498)     | 117.80       | 188.83       | 1.60  |  |
| MAPKAPK2 (Ab-272)          | 125.50       | 190.67       | 1.52  |  |
| MAPKAPK2 (Phospho-Ser272)  | 186.67       | 424.00       | 2.27  |  |
| MDM2 (Ab-166)              | 4277.83      | 11611.00     | 2.71  |  |
| MEK1 (Ab286)               | 505.33       | 1800.67      | 3.56  |  |
| MEK1 (Ab-291)              | 167.20       | 375.83       | 2.25  |  |
| MEK1 (Ab-298)              | 573.17       | 2611.50      | 4.56  |  |
| p38 MAPK (Ab-182)          | 576.00       | 4153.17      | 7.21  |  |
| p53 (Ab-18)                | 161.40       | 420.00       | 2.60  |  |
| p53 (Ab-20)                | 839.60       | 2073.50      | 2.47  |  |
| p53 (Ab-33)                | 184.67       | 379.20       | 2.05  |  |
| p53 (Ab-37)                | 166.00       | 266.83       | 1.61  |  |
| p53 (Ab-392)               | 202.17       | 303.50       | 1.50  |  |
| Positive Marker            | 8036.20      | 12036.60     | 1.50  |  |
| Raf1 (Ab-341)              | 138.83       | 219.50       | 1.58  |  |
| Rb (Ab-780)                | 177.40       | 382.00       | 2.15  |  |
| Rb (Ab-795)                | 162.17       | 485.67       | 2.99  |  |
| Rb (Ab-807)                | 207.00       | 545.60       | 2.64  |  |
| RBAK (inter)               | 133.40       | 625.33       | 4.69  |  |
| RBM5 (inter)               | 162.00       | 2247.20      | 13.87 |  |

**Supplementary Table 1. Increased expression and activation of molecules involved in proliferation in intestine samples.** Proteins with KO/WT ratios greater than 1.5 were shown.
